# Supplementary material
Source: PubMed Central journal article supplement (PMC4060646)
Supplement: 1319740111_pnas.201319740SI.pdf [file 1319740111_pnas.201319740SI.pdf]

# Supporting Information

Vitiello et al. 10.1073/pnas.1319740111

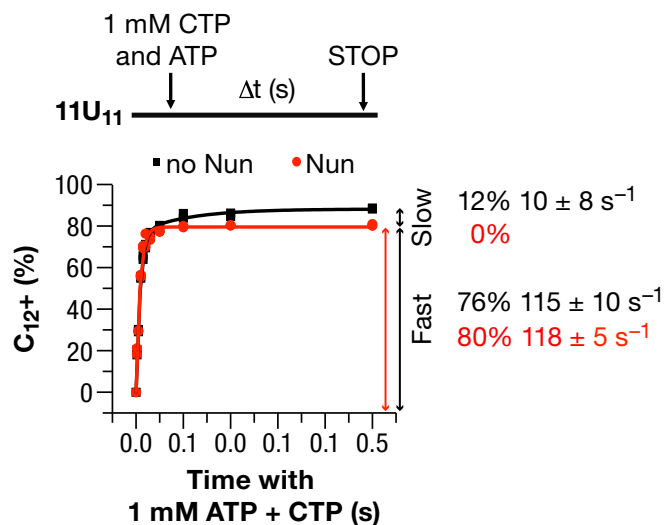

**Fig. S1.** Experiment was performed as described in Fig. 4A, but the ternary elongation complex (TEC) was formed with RNA9, TDS65U11, and NDS65U11 (Table S1) and incubated with 10  $\mu\text{M}$  UTP for 5 min to obtain TEC U<sub>11</sub>.

**Table S1. Sequences of DNA/RNA oligos**

| Sequence                                                  | TEC                  | Pausing/arrest            |
|-----------------------------------------------------------|----------------------|---------------------------|
| TDS+1 ATCCTCTCCAT <sup>+11</sup> GTG<br>RNA+1 UAGGAGAGG   | TEC9G <sub>9</sub>   | +10U(P), +11A(P), +12C(A) |
| TDS+1 ATCCTCTCCAT <sup>+11</sup> GTG<br>RNA+1 UAGGAGAGGU  | TEC10U <sub>10</sub> | +11A(P), +12C(A)          |
| TDS+1 ATCCTCTCCAT <sup>+11</sup> GTG<br>RNA+1 UAGGAGAGGUA | TEC11A <sub>11</sub> | +12C(A)                   |
| TDS+1 ATCCTCTCCAT <sup>+11</sup> GTG<br>RNA+1 GGAGAGGUA   | TEC9A <sub>11</sub>  | +12C(A)                   |
| TDS+1 ATCCTCTCCAT <sup>+11</sup> GTG<br>RNA+1 GAGAGGUA    | TEC8A <sub>11</sub>  | +14C(A)                   |

TEC, ternary elongation complex.
